# Supplementary material for: 3D Camouflage in an Ornithischian Dinosaur
Source: PubMed Central journal article supplement (PMC5049543; doi:10.1016/j.cub.2016.06.065), 2016-09-26

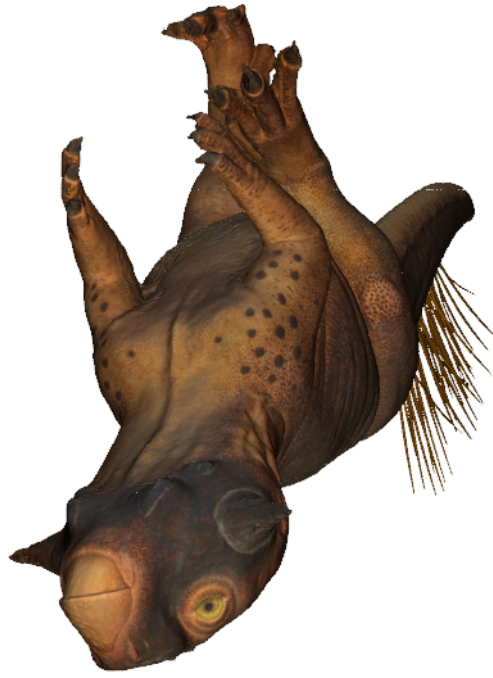

Supplement: mmc2.pdf [file mmc2.pdf]
